# Supplementary material for: Impact of Regulatory Approval Status on CADTH Reimbursement of Oncology Drugs and Role of Real-World Evidence on Conditional Approvals from 2019 to 2021
Source: MDPI journal article supplement (doi:10.3390/curroncol29110635), 2022-10-25
Supplement: s1 [file s1]

**Supplementary Materials for “Impact of Regulatory Approval Status on CADTH Reimbursement of Oncology Drugs and Role of Real-World Evidence on Conditional Approvals from 2019 to 2021” by C. Lau and G. Dranitsaris**

**Table S1.** Health Canada and CADTH review times and reimbursement decisions for oncology products with standard approvals (NOC) between 2019 and 2021

| Drugs (generic names)<br>Indicated for Tumor Type | Summary Basis of Decision (SBD) publication date | Health Canada submission date | Health Canada approval date | Time in review by Health Canada | CADTH submission date | CADTH recommendation date | Time in review by CADTH | CADTH recommendations |
|---------------------------------------------------|--------------------------------------------------|-------------------------------|-----------------------------|---------------------------------|-----------------------|---------------------------|-------------------------|-----------------------|
| Binimetinib<br>Melanoma                           | 6/8/2021                                         | 03/20/2020                    | 3/02/2021                   | 347                             | 12/16/2020            | 7/8/2021                  | 204                     | Reimburse with cond't |
| Encorafenib<br>CRC                                | 6/8/2021                                         | 03/20/2020                    | 3/02/2021                   | 347                             | 12/16/2020            | 7/8/2021                  | 204                     | Reimburse with cond't |
| Isatuximab<br>MM                                  | 12/8/2020                                        | 06/28/2019                    | 4/29/2020                   | 306                             | 8/17/2020             | 4/1/2021                  | 227                     | Reimburse with cond't |
| Fedratinib<br>MF                                  | 10/22/2020                                       | 07/19/2019                    | 7/27/2020                   | 374                             | 11/5/2020             | 6/21/2021                 | 228                     | Reimburse with cond't |
| Sonidegib<br>BCC                                  | 8/11/2020                                        | 07/04/2019                    | 6/12/2020                   | 344                             | 6/19/2020             | 04/29/2021                | 314                     | Do not Reimburse      |
| Glasdegib<br>AML                                  | 7/10/2020                                        | 03/15/2019                    | 4/2/2020                    | 384                             | 5/6/2020              | 1/8/2021                  | 247                     | Do not Reimburse      |
| Gemtuzumab<br>ozogamicin<br>AML                   | 7/10/2020                                        | 12/19/2018                    | 11/28/2019                  | 344                             | 8/9/2019              | 2/4/2020                  | 179                     | Reimburse             |
| Darolutamide<br>Prostate Cancer                   | 6/29/2020                                        | 03/27/2019                    | 2/20/2020                   | 330                             | 8/27/2019             | 4/22/2020                 | 239                     | Reimburse with cond't |
| Neratinib<br>Breast Cancer                        | 1/29/2020                                        | 06/21/2018                    | 7/16/2019                   | 390                             | 4/18/2019             | 12/5/2019                 | 231                     | Do not reimburse      |
| Talazoparib<br>Breast Cancer                      | 1/21/2020                                        | 9/28/2018                     | 9/06/2019                   | 343                             | Not filed             |                           |                         |                       |
| Acalabrutinib<br>MCL                              | 1/13/2020                                        | 03/15/2018                    | 8/23/2019                   | 526                             | 4/7/2020              | 11/17/2020                | 222                     | Reimburse with cond't |
| Dinutuximab<br>NET                                | 5/6/2019                                         | 12/14/2017                    | 11/28/2018                  | 349                             | 11/23/2020            | 7/23/2021                 | 242                     | Reimburse with cond't |

|                             |            |            |           |     |           |           |     |                       |
|-----------------------------|------------|------------|-----------|-----|-----------|-----------|-----|-----------------------|
| Decitabine<br>MDS           | 6/25/2019  | 12/21/2017 | 1/21/2019 | 396 | 10/9/2020 | 9/22/2021 | 348 | Reimburse with cond't |
| Abemacicib<br>Breast Cancer | 9/26/2019  | 04/06/2018 | 4/5/2019  | 364 | 12/3/2018 | 7/5/2019  | 214 | Reimburse with cond't |
| Dacomitinib<br>NSCLC        | 10/22/2019 | 03/16/2018 | 2/26/2019 | 347 | 9/18/2018 | 5/31/2019 | 255 | Reimburse with cond't |
| Niraparib<br>Ovarian Cancer | 11/19/2019 | 05/31/2018 | 6/27/2019 | 392 | 9/21/2020 | 4/21/2021 | 212 | Reimburse with cond't |
| Decitabine<br>MDS           | 12/11/2019 | 06/28/2018 | 7/11/2019 | 378 | Not filed |           |     |                       |

Abbreviations:

CRC: Colorectal Cancer

MM: Multiple Myeloma

MF: Myelofibrosis

BCC: Basal Cell Carcinoma

AML: Acute Myeloid Lymphoma

MCL: Mantle Cell Lymphoma

MDS: Myeloid Dysplastic Syndrome

**Table S2.** Health Canada and CADTH review times and reimbursement decisions for oncology products with conditional approvals (NOCc) between 2019 and 2021

| Drugs (generic names)<br>Indicated for Tumor Type | Summary Basis of Decision (SBD) publication date | Health Canada submission date | Health Canada approval date | Time in review by Health Canada | CADTH submission date | CADTH recommendation date | Time in review by CADTH | CADTH recommendations |
|---------------------------------------------------|--------------------------------------------------|-------------------------------|-----------------------------|---------------------------------|-----------------------|---------------------------|-------------------------|-----------------------|
| Sotorasib<br>NSCLC                                | 12/7/2021                                        | 1/14/2021                     | 10/22/2021                  | 239                             | Not filed             |                           |                         |                       |
| Infgratinib<br>CC                                 | 11/30/2021                                       | 11/30/2020                    | 9/27/2021                   | 301                             | Not filed             |                           |                         |                       |
| Pralsetinib<br>NSCLC                              | 11/26/2021                                       | 9/8/2020                      | 6/30/2021                   | 295                             | 3/9/2022              | active                    |                         |                       |
| Tafasitamab<br>DLBCL                              | 11/25/2021                                       | 12/4/2020                     | 8/19/2021                   | 258                             | 11/19/2021            | active                    |                         |                       |
| Idecabtagene vicleucel<br>MM                      | 11/22/2021                                       | 9/17/2020                     | 5/26/2021                   | 251                             | 12/16/2020            | 11/12/2021                | 331                     | Do not reimburse      |
| Selpercatinib<br>NSCLC and Thyroid Cancer         | 11/9/2021                                        | 9/10/2020                     | 6/15/2021                   | 278                             | 10/29/2021            | 5/5/2022                  | 188                     | Reimburse with cond't |
| Tepotinib<br>NSCLC                                | 10/21/2021                                       | 7/31/2020                     | 5/27/2021                   | 300                             | 8/30/2021             | 8/24/2022                 | 360                     | Do not reimburse      |
| Trastuzumab deruxtecan<br>Breast Cancer           | 7/9/2021                                         | 7/24/2020                     | 4/15/2021                   | 265                             | 3/23/2022             | active                    |                         |                       |
| Polatuzumab vedotin<br>DLBCL                      | 10/8/2020                                        | 10/04/2019                    | 7/9/2020                    | 279                             | 9/29/2020             | 4/21/2021                 | 204                     | Reimburse with cond't |
| Entrectinib<br>ECT                                | 7/16/2020                                        | 5/7/2019                      | 2/10/2020                   | 279                             | 1/25/2022             | active                    |                         |                       |
| Brigatinib<br>NSCLC                               | 1/28/2019                                        | 10/17/2017                    | 7/26/2018                   | 282                             | 12/05/2018            | 8/01/2019                 | 235                     | Do not reimburse      |
| Pralatrexate<br>NSCLC                             | 4/29/2019                                        | 7/18/2017                     | 10/26/2018                  | 465                             | 6/1/2018              | 4/4/2019                  | 307                     | Reimburse with cond't |

|                                       |            |            |            |     |            |            |     |                       |
|---------------------------------------|------------|------------|------------|-----|------------|------------|-----|-----------------------|
| Lorlatinib<br>NSCLC                   | 7/18/2019  | 4/26/2018  | 2/22/2019  | 302 | 6/11/2019  | 1/30/2020  | 233 | Do not reimburse      |
| Enasidenib<br>AML                     | 8/19/2019  | 6/15/2018  | 2/6/2019   | 236 | 4/19/2019  | 10/31/2019 | 195 | Do not reimburse      |
| Cemiplimab-rwlc<br>CSCC               | 8/27/2019  | 07/27/2018 | 4/10/2019  | 257 | 7/9/2019   | 1/22/2020  | 197 | Reimburse with cond't |
| Larotrecinib<br>NTRK mutated<br>tumor | 12/18/2019 | 9/18/2018  | 7/10/2019  | 295 | 11/16/2020 | 9/13/2021  | 301 | Do not reimburse      |
| Erdafitinib<br>Bladder Cancer         | 1/28/2020  | 2/8/2019   | 10/25/2019 | 259 | Not filed  |            |     |                       |

Abbreviations:

NSCLC: Non-Small Cell Lung Cancer

CC: Cholangiocarcinoma

MM: Multiple Myeloma

DLBCL: Diffused Large B Cell Lymphoma

ECT: Extra Cranial solid Tumor

AML: Acute Myeloid Leukemia

CSCC: Cutaneous Squamous Cell Carcinoma

NTRK: Neurotrophic Receptor Tyrosine Kinase

**Table S3.** Health Canada and CADTH review times and reimbursement decisions for oncology products with Priority approvals (PR) between 2019 and 2021

| Drugs (generic names)<br>Indicated for<br>Tumor Type | Summary<br>Basis of<br>Decision<br>(SBD)<br>publication<br>date | Health<br>Canada<br>submission<br>date | Health<br>Canada<br>approval<br>date | Time in<br>Review by<br>Health<br>Canada | CADTH<br>submission<br>date | CADTH<br>recommendation<br>date | Time in<br>review by<br>CADTH | CADTH<br>recommendations |
|------------------------------------------------------|-----------------------------------------------------------------|----------------------------------------|--------------------------------------|------------------------------------------|-----------------------------|---------------------------------|-------------------------------|--------------------------|
| Brexucabtagene<br>autoleucel<br>MCL                  | 12/6/2021                                                       | 11/13/2020                             | 6/8/2021                             | 207                                      | 12/18/2020                  | 8/6/2021                        | 231                           | Reimburse with cond't    |
| sacituzumab<br>govitecanhziy<br>Breast Cancer        | 12/23/2021                                                      | 01/25/2021                             | 9/24/2021                            | 242                                      | 6/30/2021                   | 1/22/2022                       | 206                           | Reimburse with cond't    |
| Tucatinib<br>Breast Cancer                           | 10/1/2020                                                       | 01/20/2020                             | 6/3/2020                             | 137                                      | 3/26/2021                   | 11/1/2021                       | 220                           | Reimburse with cond't    |
| Ipreitinib<br>GST                                    | 9/22/2020                                                       | 12/23/2019                             | 6/19/2020                            | 179                                      | 10/15/2021                  | 4/14/2022                       | 181                           | Reimburse with cond't    |
| Decitabine and<br>cedazuridine<br>MDS                | 9/21/2020                                                       | 12/31/2019                             | 7/7/2020                             | 189                                      | 10/9/2020                   | 9/22/2021                       | 348                           | Reimburse with cond't    |
| Axicabtagene<br>ciloleucel<br>DLBCL                  | 8/15/2019                                                       | 07/19/2018                             | 2/13/2019                            | 209                                      | 10/25/2018                  | 8/15/2019                       | 294                           | Reimburse with cond't    |
| Zanubrutinib<br>WM                                   | 7/15/2021                                                       | 08/13/2020                             | 3/01/2021                            | 200                                      | 5/21/2021                   | 12/21/2021                      | 214                           | Reimburse with cond't    |
| Lutetium Lu177<br>dotatate<br>NET                    | 5/29/2019                                                       | 06/18/2018                             | 1/9/2019                             | 205                                      | 7/30/2018                   | 8/1/2019                        | 367                           | Reimburse with cond't    |
| Giltertinib<br>AML                                   | 3/23/2019                                                       | 5/15/2019                              | 12/23/2019                           | 222                                      | 10/19/2019                  | 5/20/2020                       | 214                           | Reimburse with cond't    |
| Cabozantinib<br>NSCLC                                | 2/12/2019                                                       | 06/05/2017                             | 9/14/2018                            | 466                                      | 9/17/2018                   | 2/20/2019                       | 156                           | Reimburse with cond't    |
| Tisagenlecleucel<br>RCC                              | 2/8/2019                                                        | 02/04/2018                             | 9/5/2018                             | 208                                      | 2/9/2018                    | 1/15/2019                       | 340                           | Reimburse with cond't    |

Abbreviations:

MCL: Mantle Cell Lymphoma

GST: Gastrointestinal Stroma Tumor

MDS: Myeloid Dysplastic Syndrome

DLBCL: Diffused Large B Cell Lymphoma

WM: Waldenstrom Macroglobulinema

NET: Neuro Endocrine Tumor

AML: Acute Myeloid Leukemia

NSCLC: Non-Small Cell Lung Cancer

RCC: Renal Cell Carcinoma

**Table S4.** Examples of critical appraisals of Health Canada Conditional approvals (NOCc) by CADTH reviewers

| Parameters important for the evaluation of RWE to be incorporated into decision-making                                    | Examples from the CADTH “Clinical Review” for “Reimburse with Conditions” for NOCc approvals (N=4)                                                                                                                                                                                                                                                                                                                                                                                                                                                                                                                                                                                                                              | Examples from the CADTH “Clinical Review” for “Do Not Reimburse” for NOCc approvals (N=6)                                                                                                                                                                                                                                                                                                                                                                                                                          |
|---------------------------------------------------------------------------------------------------------------------------|---------------------------------------------------------------------------------------------------------------------------------------------------------------------------------------------------------------------------------------------------------------------------------------------------------------------------------------------------------------------------------------------------------------------------------------------------------------------------------------------------------------------------------------------------------------------------------------------------------------------------------------------------------------------------------------------------------------------------------|--------------------------------------------------------------------------------------------------------------------------------------------------------------------------------------------------------------------------------------------------------------------------------------------------------------------------------------------------------------------------------------------------------------------------------------------------------------------------------------------------------------------|
| <p>Bias:</p> <ul style="list-style-type: none"> <li>- Selection bias/information bias/endpoint assessment bias</li> </ul> | <ul style="list-style-type: none"> <li>- the most significant of these included the high risk of selection bias owing to the retrospective nature of the historical comparator data</li> <li>- Thus, the prognostic factors missing from the models may have had an influence on the outcomes of interest and the reported estimates therefore may be biased.</li> <li>- These differences are largely unaccounted for in the methodology and may produce systematic differences between populations and introduce bias in the analyses</li> <li>- There is also a potential measurement bias owing to differences in the frequency and conduct of disease assessments in clinical practice versus the trial setting</li> </ul> | <ul style="list-style-type: none"> <li>- The results may be biased due to unmeasured baseline characteristics and failure to conduct a quality assessment of the included studies</li> <li>- Bias due to imbalance in unmeasured confounders is a potential limitation to these results</li> <li>- The bias resulting from missing covariates is very difficult to quantify, and as a result, it is unclear what impact the missing covariates have on the results of the MAICs.</li> </ul>                        |
| <p>Heterogeneity</p> <ul style="list-style-type: none"> <li>- Study population/trials/across studies</li> </ul>           | <ul style="list-style-type: none"> <li>- The studies differed from each other in notable ways. Most notable to the heterogeneity of the studies was the designs, inclusion/exclusion criteria, and the median follow-ups.</li> <li>- These ITCs have a number of limitations that impact their internal and external validity, such as not being able to comprehensively assess the clinical heterogeneities across the included individual studies and their influence on the study results due to the lack of reporting certain patient characteristics, uncertainty still exists on the treatment effect</li> </ul>                                                                                                          | <ul style="list-style-type: none"> <li>- Differences that arose during study design and when combining patients across databases (i.e., selecting patients from different databases) may result in the introduction of clinical heterogeneity that cannot be accounted for in propensity score modelling.</li> <li>- there was limited assessment and reporting of clinically important heterogeneity, and the statistical analyses completed are unlikely to have accounted for all major differences.</li> </ul> |

|                                                                                                                          |                                                                                                                                                                                                                                                                                                                                                                                                                                                                                                                                                                                                                                                                                                                                                                                                                                                                                                                                                                                                                                                                                                                                                                                                                                                                                                                                                                                                                                                                                                                                                                                                                                                                                                                                                                                            |                                                                                                                                                                                                                                                                                                                                                                                                                                                                                                                                                                                                                                                                                                                                                                                                                                                                                                                                                                                                                                                                                                                                                                                                                                                                                                                                                                            |
|--------------------------------------------------------------------------------------------------------------------------|--------------------------------------------------------------------------------------------------------------------------------------------------------------------------------------------------------------------------------------------------------------------------------------------------------------------------------------------------------------------------------------------------------------------------------------------------------------------------------------------------------------------------------------------------------------------------------------------------------------------------------------------------------------------------------------------------------------------------------------------------------------------------------------------------------------------------------------------------------------------------------------------------------------------------------------------------------------------------------------------------------------------------------------------------------------------------------------------------------------------------------------------------------------------------------------------------------------------------------------------------------------------------------------------------------------------------------------------------------------------------------------------------------------------------------------------------------------------------------------------------------------------------------------------------------------------------------------------------------------------------------------------------------------------------------------------------------------------------------------------------------------------------------------------|----------------------------------------------------------------------------------------------------------------------------------------------------------------------------------------------------------------------------------------------------------------------------------------------------------------------------------------------------------------------------------------------------------------------------------------------------------------------------------------------------------------------------------------------------------------------------------------------------------------------------------------------------------------------------------------------------------------------------------------------------------------------------------------------------------------------------------------------------------------------------------------------------------------------------------------------------------------------------------------------------------------------------------------------------------------------------------------------------------------------------------------------------------------------------------------------------------------------------------------------------------------------------------------------------------------------------------------------------------------------------|
| <p>Inability to adjust of cofounders, measured or unmeasured, prognostic variables and effect modifiers not included</p> | <ul style="list-style-type: none"> <li>- due to the lack of reporting certain patient characteristics, uncertainty still exists on the treatment effect of X despite of various adjustments, and generalizability of the study findings to patients</li> <li>- A number of limitations that impact their internal and external validity, such as not being able to comprehensively assess the clinical heterogeneities across the included individual studies and their influence on the study results due to the lack of reporting certain patient characteristics, uncertainty still exists on the treatment effect</li> <li>- the submitted reports are related to the quality of the analysis, limited control of prognostic factors and effect modifiers, and the heterogeneity of the evidence used</li> <li>- A MAIC adjusts for trial differences in known prognostic factors or treatment effect modifiers; however, it does not account for unknown cross-trial differences that may be present. Consequently, treatment effect estimates obtained by the MAIC are still susceptible to bias resulting from unknown confounding</li> <li>- While a targeted literature search was performed for prognostic factors, no effect modifiers were considered in the analysis. In the Core model, the sponsor only included prognostic factors that were reported as statistically significant in at least one of the studies identified in the Systematic Literature Research (SLR). Prognostic factors found to be non-statistically significant were included in the extended model. In order to obtain an unbiased estimate of differences in the treatment effects, all prognostic factors and effect modifiers for a given outcome must be adjusted for in the model.</li> </ul> | <ul style="list-style-type: none"> <li>- however, it is not clear if the underlying assumption of the unanchored MAIC that all effect modifiers and prognostic factors have been accounted for was accomplished.</li> <li>- None of the articles retrieved through the literature search spoke directly about the prognostic relevance of the specific gene fusion. All primary studies retrieved through the literature search were retrospective in design. In cases where presence of the gene fusion were verified, sample sizes were small, making the generalizability of findings difficult to determine</li> <li>- the lack of adjustment for all important potential confounders in the analyzes. In view of the substantial uncertainty in the ITC results, pERC could not draw any conclusions pertaining to the efficacy</li> <li>- inability to adjust for all potential confounders and prognostic variables and use of inappropriate analysis methods for MAIC (e.g., not providing residual bias estimates for MAICs).</li> <li>- Imbalance remained after matching for the cytogenetic risk profile. Patients in the France chart review study appear to have a better cytogenetic risk profile than the trial population, after matching. The results of the analysis can be misleading, given that the ATU represents the effect of the drug</li> </ul> |
|--------------------------------------------------------------------------------------------------------------------------|--------------------------------------------------------------------------------------------------------------------------------------------------------------------------------------------------------------------------------------------------------------------------------------------------------------------------------------------------------------------------------------------------------------------------------------------------------------------------------------------------------------------------------------------------------------------------------------------------------------------------------------------------------------------------------------------------------------------------------------------------------------------------------------------------------------------------------------------------------------------------------------------------------------------------------------------------------------------------------------------------------------------------------------------------------------------------------------------------------------------------------------------------------------------------------------------------------------------------------------------------------------------------------------------------------------------------------------------------------------------------------------------------------------------------------------------------------------------------------------------------------------------------------------------------------------------------------------------------------------------------------------------------------------------------------------------------------------------------------------------------------------------------------------------|----------------------------------------------------------------------------------------------------------------------------------------------------------------------------------------------------------------------------------------------------------------------------------------------------------------------------------------------------------------------------------------------------------------------------------------------------------------------------------------------------------------------------------------------------------------------------------------------------------------------------------------------------------------------------------------------------------------------------------------------------------------------------------------------------------------------------------------------------------------------------------------------------------------------------------------------------------------------------------------------------------------------------------------------------------------------------------------------------------------------------------------------------------------------------------------------------------------------------------------------------------------------------------------------------------------------------------------------------------------------------|



|                                             |                                                                                                                                                                                                                                                                                                                                                                                                                                                                                                                                                                                |                                                                                                                                                                                                                                                                                                                                                                                                                                                                                                                                                                                                                                                    |
|---------------------------------------------|--------------------------------------------------------------------------------------------------------------------------------------------------------------------------------------------------------------------------------------------------------------------------------------------------------------------------------------------------------------------------------------------------------------------------------------------------------------------------------------------------------------------------------------------------------------------------------|----------------------------------------------------------------------------------------------------------------------------------------------------------------------------------------------------------------------------------------------------------------------------------------------------------------------------------------------------------------------------------------------------------------------------------------------------------------------------------------------------------------------------------------------------------------------------------------------------------------------------------------------------|
| Methodology<br>Use of inappropriate methods | <ul style="list-style-type: none"> <li>- No statistical analyses were performed (e.g. multivariate regression model analyses) to identify a subset of variables most predictive of outcome to include for matching. Further, it is unknown how missing data on variables used for matching were handled in the analysis</li> <li>- due to the limitations identified, the findings from the MAIC were inconclusive because the assumptions used for the unanchored analyses are impossible to meet and present an unknown amount of bias in the unanchored estimate</li> </ul> | <ul style="list-style-type: none"> <li>- These limitations, combined with the flaw in the presentation of the methodological quality of the included studies, limits the overall confidence in the results of the methodological quality of the included studies, limits the overall confidence in the results of this review</li> <li>- Any potential risks of bias of the included data sources (i.e., methodological limitations) were not assessed and not reported.</li> <li>- The NMA is inherently flawed given the use of unanchored MAIC data to create “virtual studies” to represent head-to-head trials within the networks</li> </ul> |
| Data missing with extensive imputation      | <ul style="list-style-type: none"> <li>- Fewer than 25% of the remaining adherent patients continued the assessment after week 29. When the data was presented in linear plots, there appears to be higher scores in the treated groups and scores remained flat in the BR group, however the significant amount of missing data limits confidence in this analysis.</li> </ul>                                                                                                                                                                                                | <ul style="list-style-type: none"> <li>- In addition, the indirect comparisons may have been biased by the differential distribution of invalid or missing data between the V clinical trial and retrospective datasets</li> <li>- which implies potential bias due to the need to rely on multiple imputation methods, increasing the uncertainty in effect estimates.</li> </ul>                                                                                                                                                                                                                                                                 |
